# Supplementary material
Source: Springer Nature journal article supplement (https://www.springermedizin.de/resource/supplementary/12879_2012_2504_MOESM2_ESM.pdf/9444708)
Supplement: MOESM2 [file 9444708]

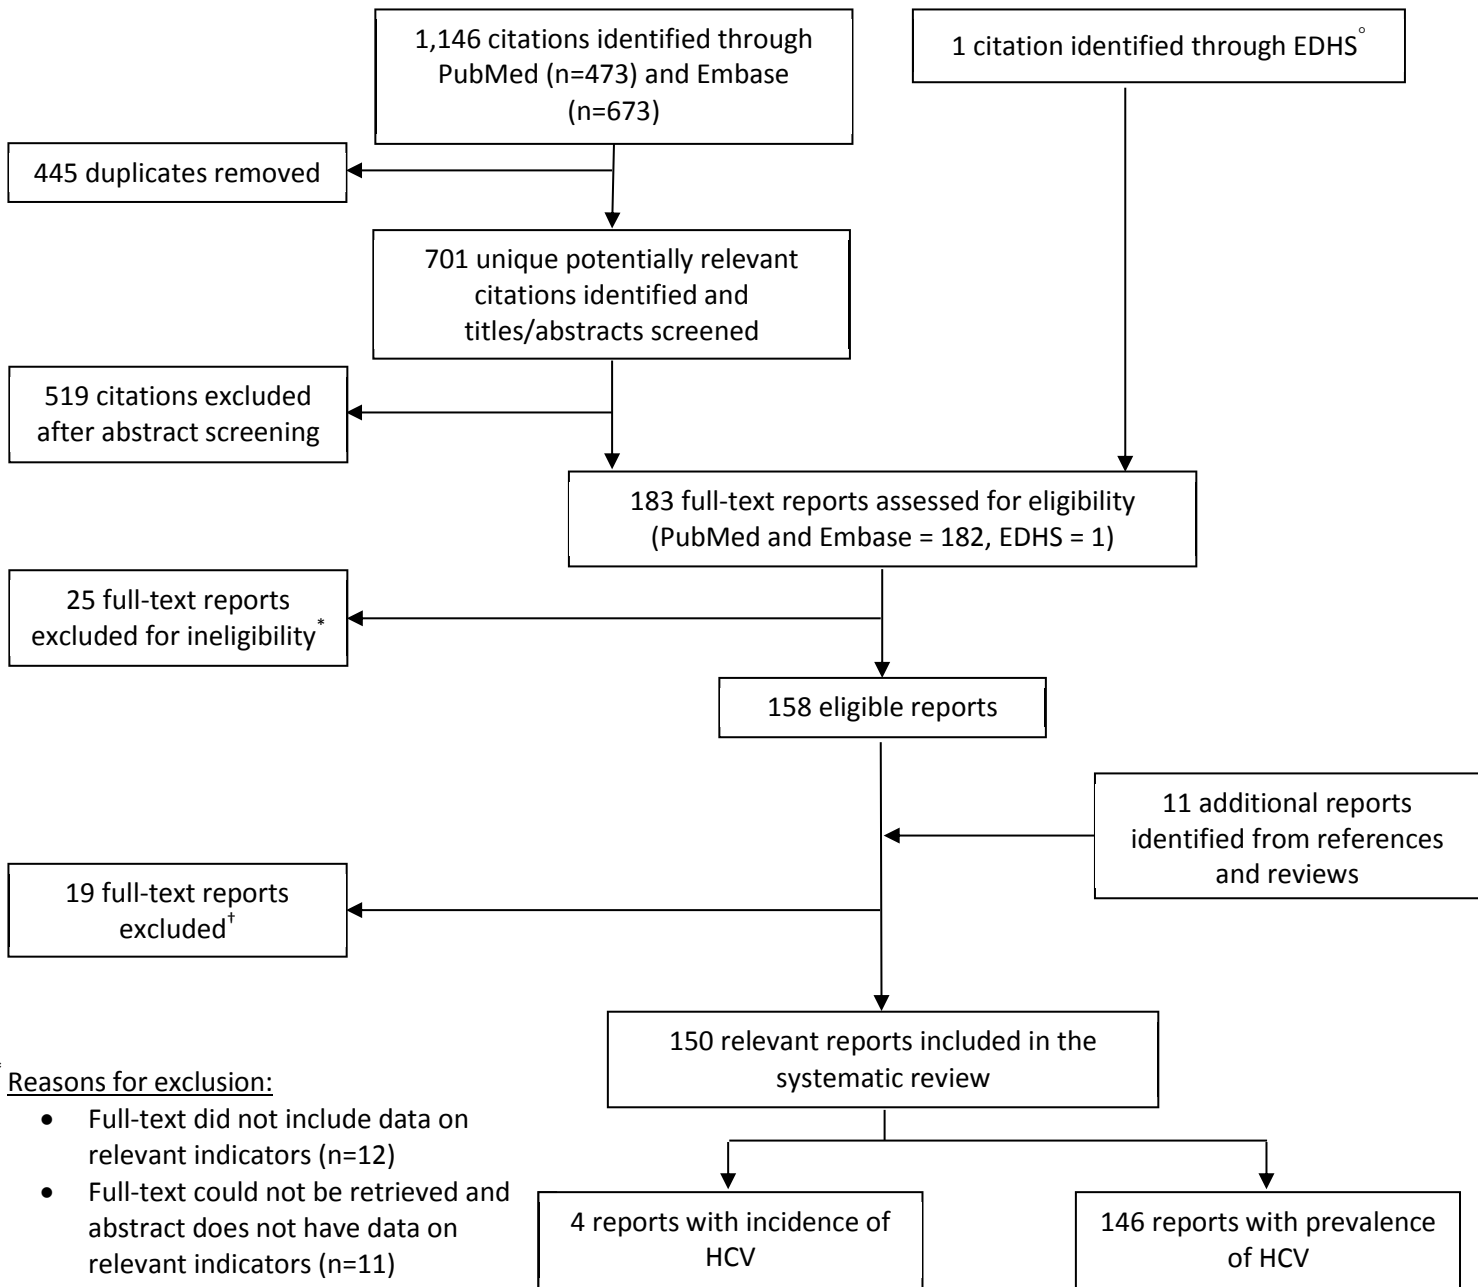

\* Reasons for exclusion:

- Full-text did not include data on relevant indicators (n=12)
- Full-text could not be retrieved and abstract does not have data on relevant indicators (n=11)
- Study population selected based on HCV sero-status (n=2)

† Reasons for exclusion:

- Same dataset as another included relevant publication (n=12)
- Neither full-text nor abstracts could be retrieved (n=7)

° EDHS: Egyptian demographic health survey
